# Supplementary material for: Earthquake transformer—an attentive deep-learning model for simultaneous earthquake detection and phase picking
Source: PubMed Central journal article supplement (PMC7415159; doi:10.1038/s41467-020-17591-w), 2020-08-07
Supplement: 41467_2020_17591_MOESM3_ESM.pdf [file 41467_2020_17591_MOESM3_ESM.pdf]

## Descriptions of Additional Supplementary Files

### Movie 01

**Description:** Evolution of the seismicity (detected and located in our study) in the Tottori area in map view

### Movie 01

**Description:** Evolution of the seismicity (detected and located in our study) in the Tottori area in cross-section.
